# Supplementary material for: Integrative analysis the characterization of peroxiredoxins in pan-cancer
Source: Springer Nature journal article supplement (doi:10.1186/s12935-021-02064-x), 2021-07-10

# Figure.S1

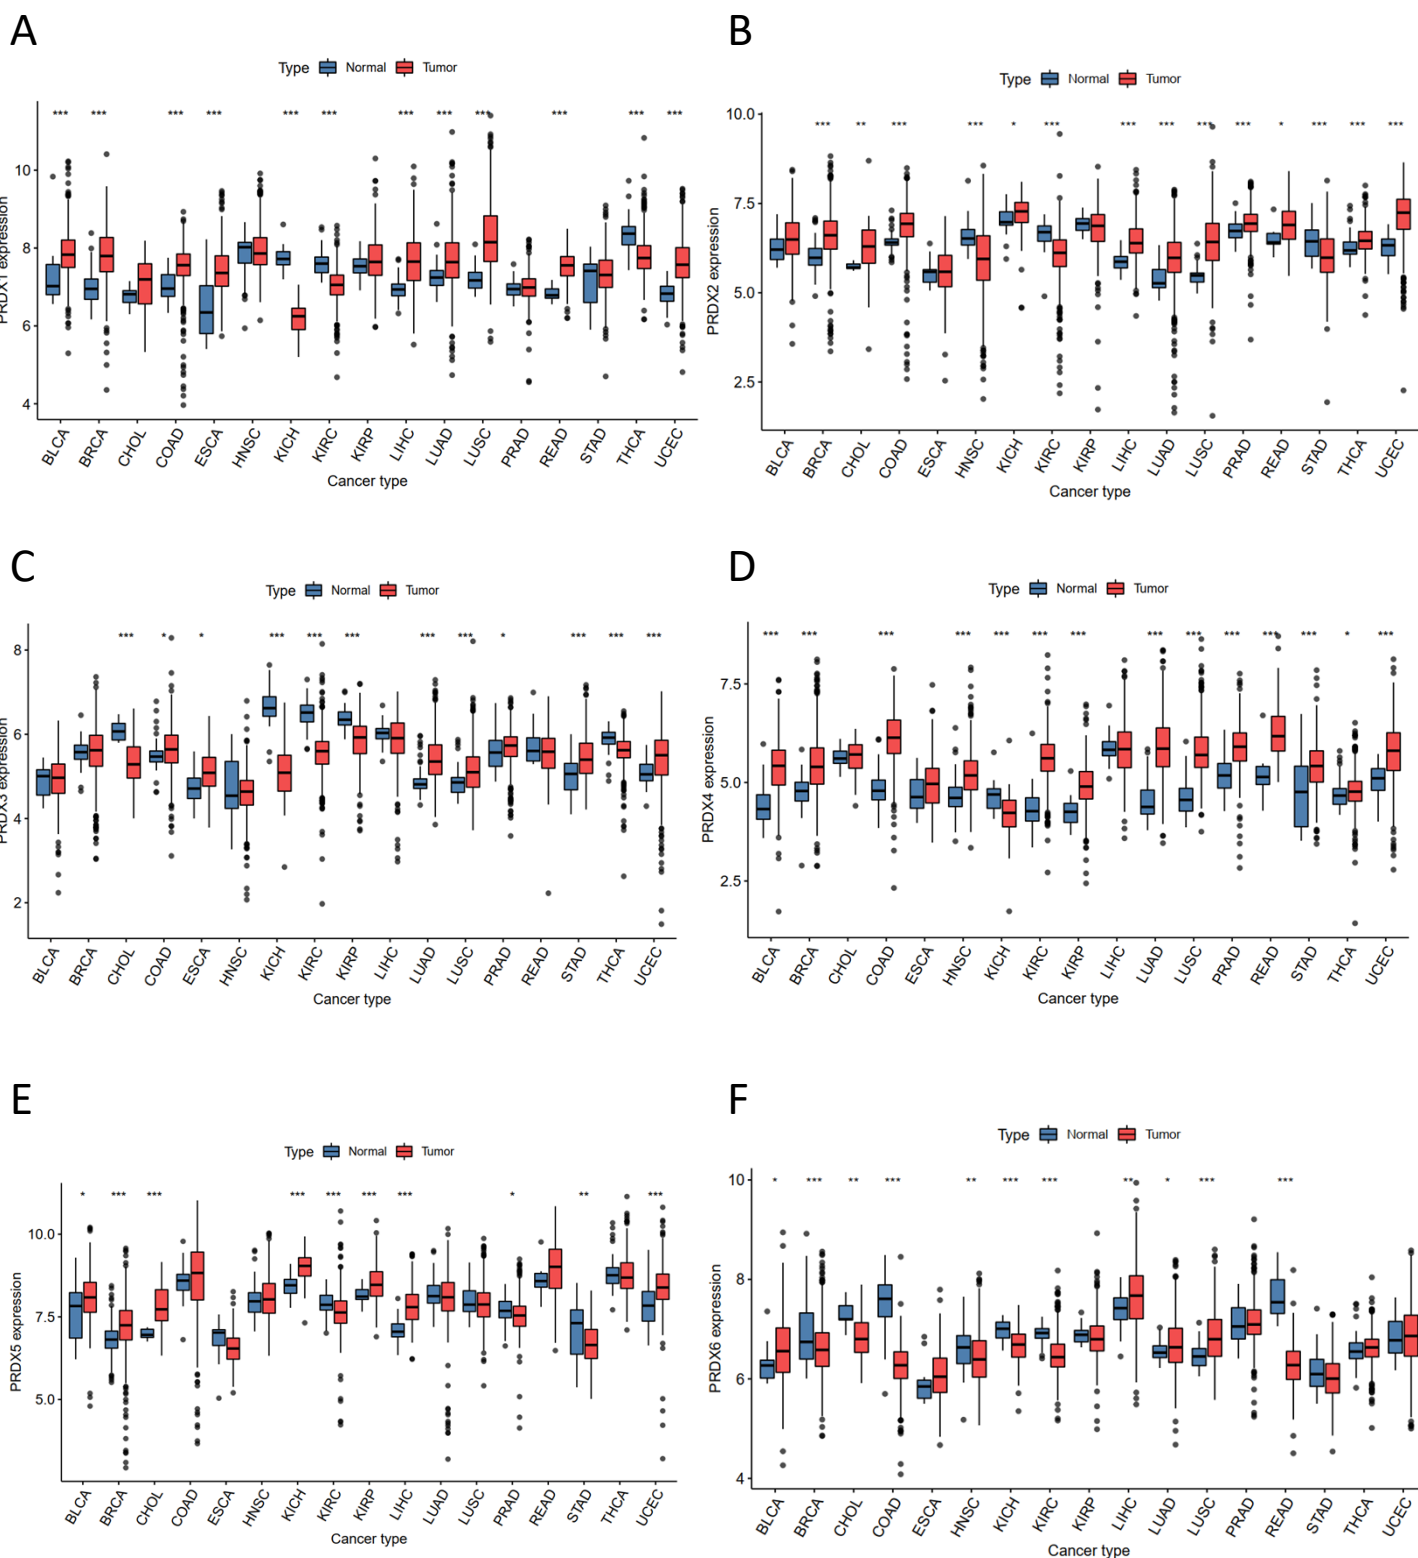

Figure.S2

DFI

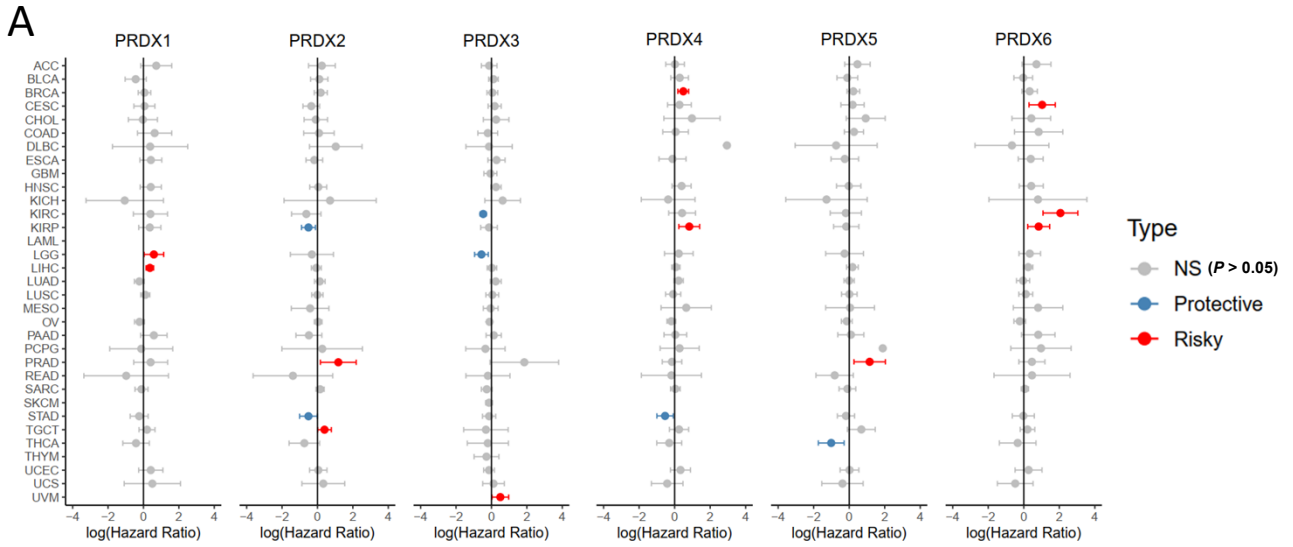

DSS

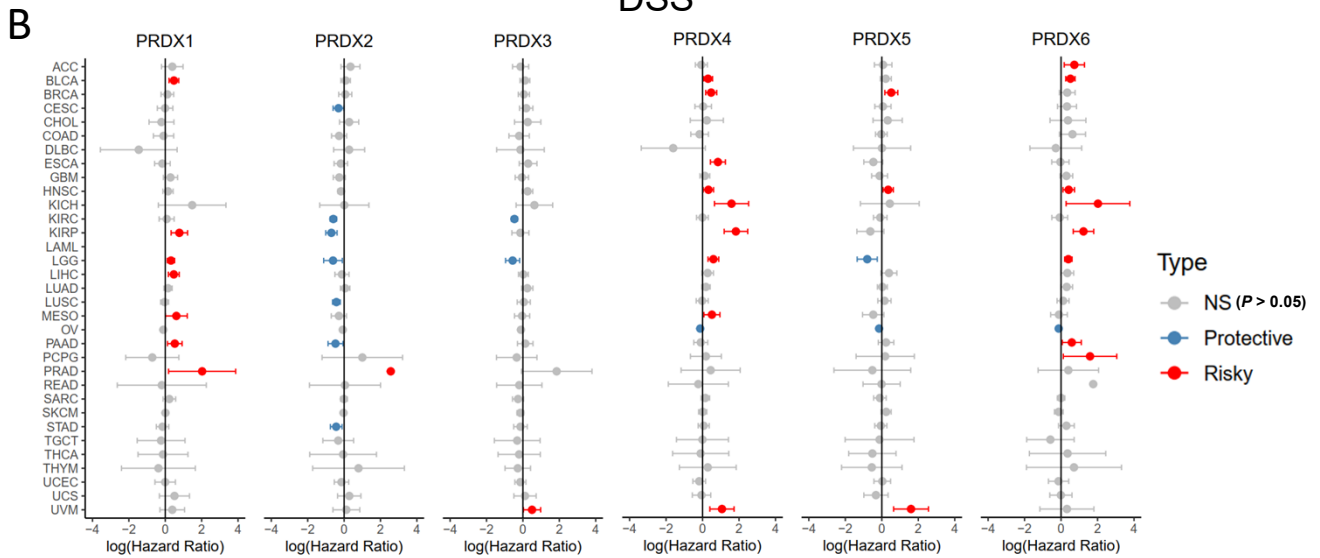

**C**

PFI

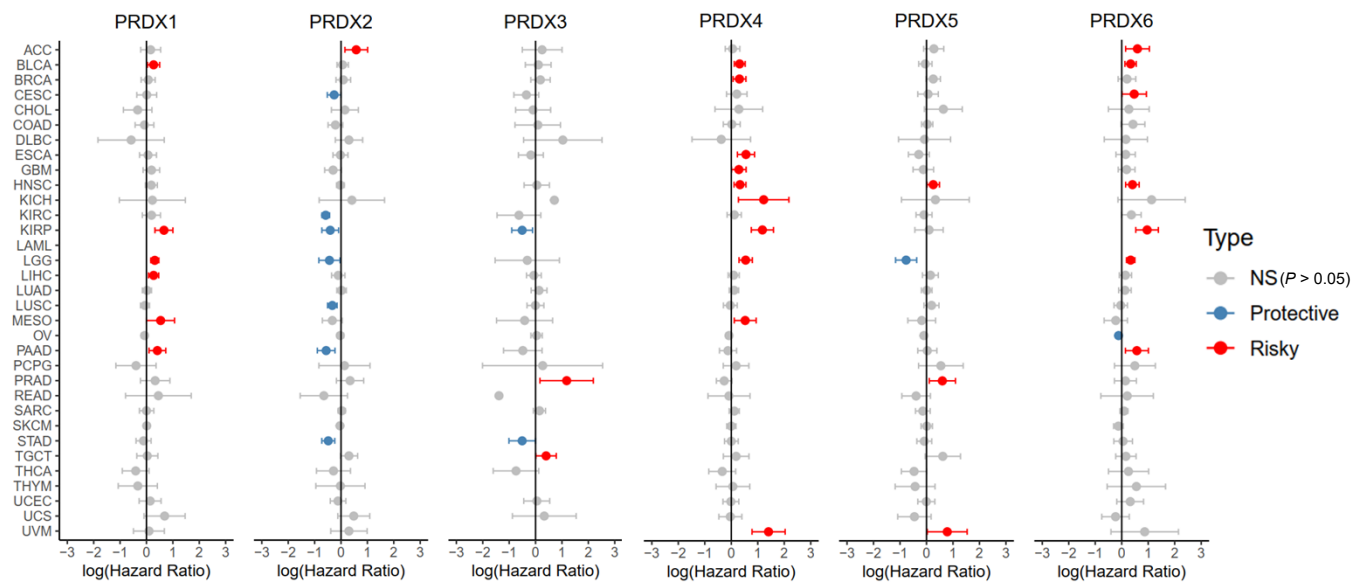

# Figure.S3

## A

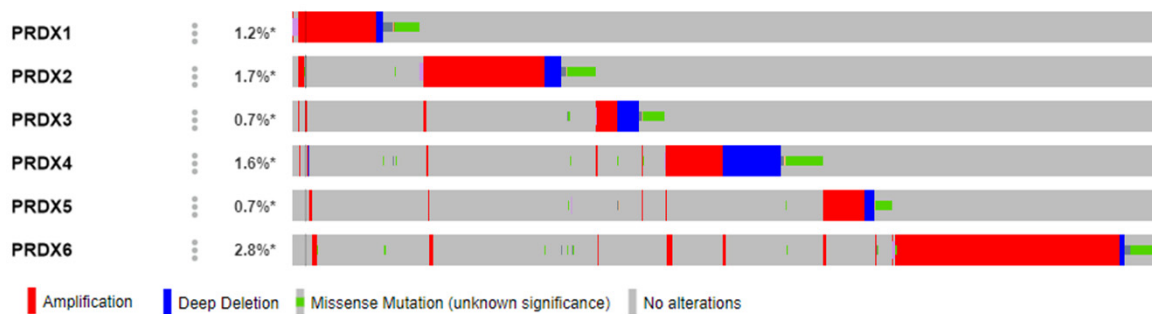

## B

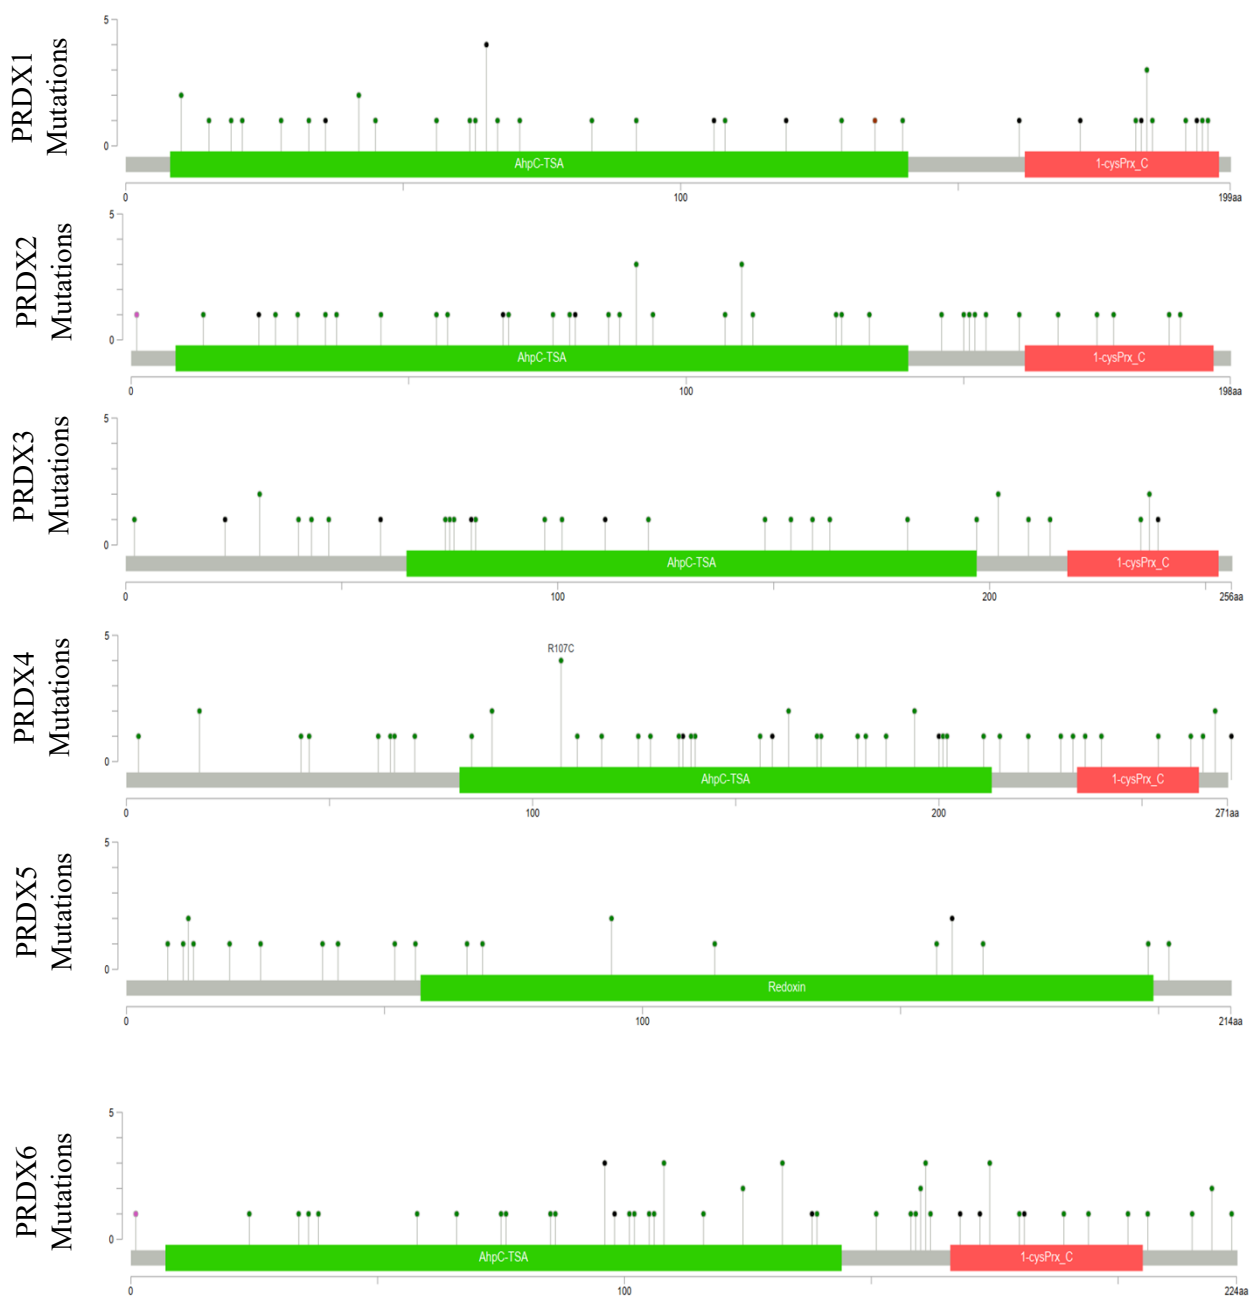

Figure.S4

A

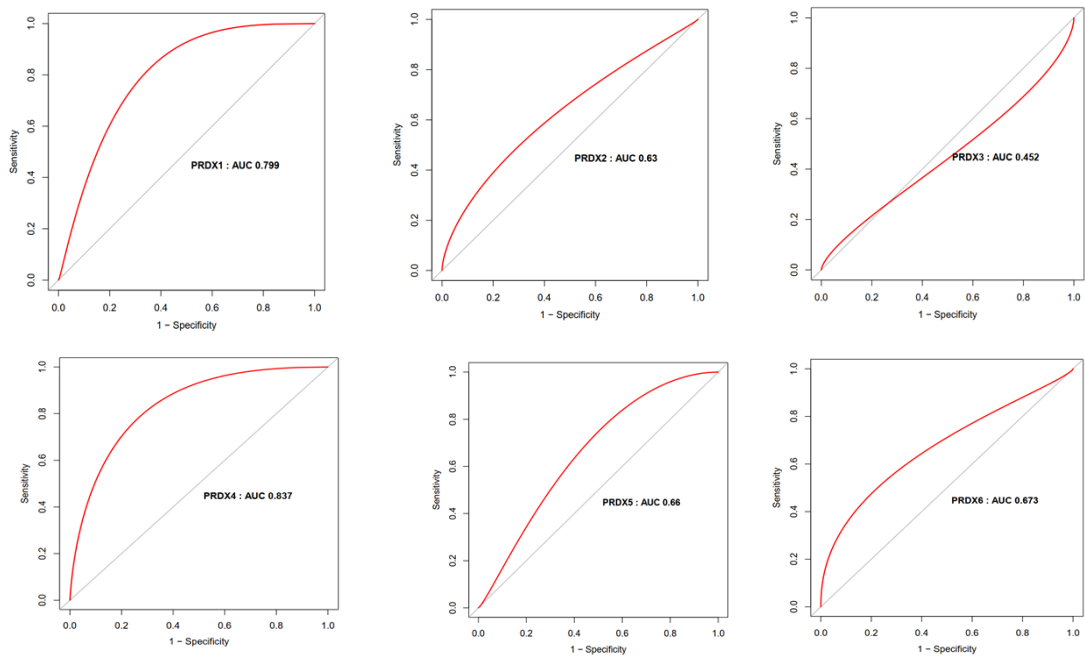

B

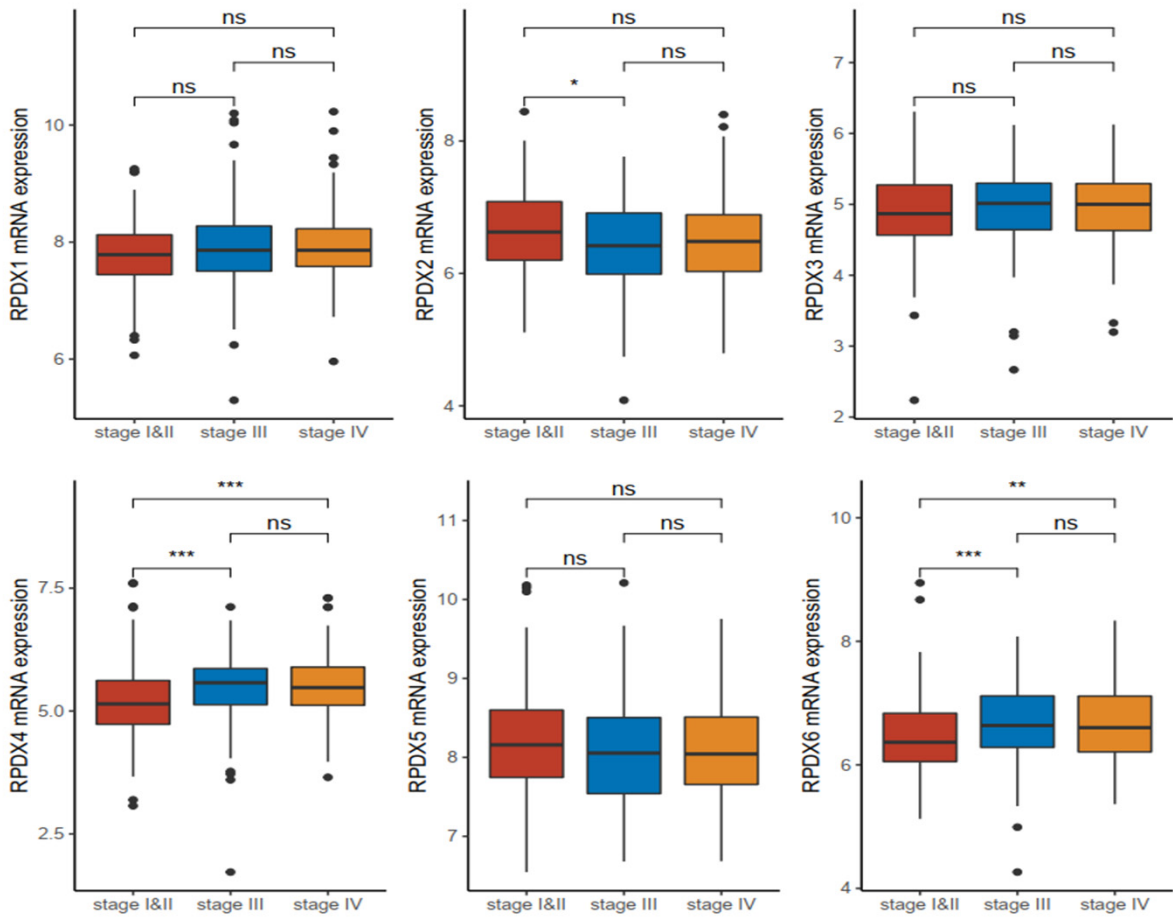

Table S1 The associations of PRDXs and mRNAsi.

| CancerType | PRDX1    |          | PRDX2    |          | PRDX3    |          |
|------------|----------|----------|----------|----------|----------|----------|
|            | cor      | pvalue   | cor      | pvalue   | cor      | pvalue   |
| TGCT       | 0.662515 | 0        | -0.06596 | 0.414386 | 0.26808  | 0.000775 |
| UCEC       | 0.499293 | 0        | 0.320639 | 6.16E-14 | 0.246003 | 1.18E-08 |
| BRCA       | 0.456143 | 0        | 0.236001 | 3.99E-15 | 0.062662 | 0.038969 |
| HNSC       | 0.447386 | 0        | 0.454016 | 0        | 0.190253 | 2.07E-05 |
| LUSC       | 0.432584 | 0        | 0.458464 | 0        | 0.205984 | 4.91E-06 |
| UCS        | 0.431032 | 0.001013 | 0.459945 | 0.000418 | 0.225632 | 0.094539 |
| LUAD       | 0.417209 | 0        | 0.214372 | 1.12E-06 | 0.460025 | 0        |
| COAD       | 0.390515 | 0        | 0.357645 | 1.13E-14 | 0.416368 | 0        |
| KIRP       | 0.388799 | 1.55E-11 | 0.271295 | 3.82E-06 | 0.408927 | 8.98E-13 |
| OV         | 0.382456 | 1.76E-10 | 0.351494 | 5.47E-09 | 0.368605 | 8.60E-10 |
| LIHC       | 0.368428 | 3.32E-13 | 0.153647 | 0.003074 | -0.04513 | 0.386505 |
| STAD       | 0.363988 | 1.21E-12 | 0.383337 | 4.92E-14 | 0.385884 | 3.07E-14 |
| SARC       | 0.315967 | 2.53E-07 | 0.125838 | 0.043493 | 0.186771 | 0.002633 |
| READ       | 0.309497 | 9.13E-05 | 0.305394 | 0.000114 | 0.3868   | 7.54E-07 |
| CESC       | 0.302641 | 9.00E-08 | 0.279571 | 8.46E-07 | 0.013018 | 0.821357 |
| MESO       | 0.287042 | 0.007555 | -0.05522 | 0.612938 | 0.232228 | 0.031648 |
| BLCA       | 0.276518 | 1.83E-08 | 0.404675 | 0        | 0.166558 | 0.000789 |
| KIRC       | 0.267753 | 8.05E-10 | 0.214567 | 9.68E-07 | 0.363213 | 8.25E-18 |
| PAAD       | 0.265948 | 0.000823 | 0.263264 | 0.000933 | 0.125365 | 0.118835 |
| ESCA       | 0.257846 | 0.001031 | 0.356243 | 4.39E-06 | 0.448271 | 4.11E-09 |
| CHOL       | 0.250965 | 0.139583 | 0.098842 | 0.564956 | 0.198713 | 0.244315 |
| GBM        | 0.216541 | 0.005156 | 0.484728 | 4.26E-11 | 0.00322  | 0.967132 |
| PRAD       | 0.192063 | 1.86E-05 | 0.345228 | 4.19E-15 | 0.433857 | 0        |
| THCA       | 0.171614 | 0.000109 | 0.332477 | 2.28E-14 | 0.394367 | 0        |
| SKCM       | 0.165132 | 0.000325 | -0.05564 | 0.228042 | 0.25464  | 2.35E-08 |
| LAML       | 0.041478 | 0.619966 | 0.021973 | 0.792835 | 0.416194 | 2.52E-07 |
| DLBC       | 0.03528  | 0.811404 | -0.01465 | 0.921231 | 0.310139 | 0.032367 |
| ACC        | -0.08689 | 0.4486   | 0.475512 | 1.39E-05 | 0.227937 | 0.044946 |
| KICH       | -0.10375 | 0.413622 | 0.498397 | 3.55E-05 | 0.078571 | 0.536229 |
| UVM        | -0.14534 | 0.197928 | 0.071683 | 0.526709 | 0.215026 | 0.055594 |
| LGG        | -0.40949 | 0        | 0.397624 | 0        | 0.19773  | 5.44E-06 |
| PCPG       | -0.41279 | 9.69E-09 | 0.292609 | 6.57E-05 | 0.197628 | 0.007575 |
| THYM       | -0.57007 | 0        | 0.666764 | 0        | 0.163018 | 0.076528 |

(continue)

| CancerType | PRDX4    |          | PRDX5    |          | PRDX6    |          |
|------------|----------|----------|----------|----------|----------|----------|
|            | cor      | pvalue   | cor      | pvalue   | cor      | pvalue   |
| TGCT       | 0.359035 | 5.21E-06 | -0.05548 | 0.492538 | 0.004921 | 0.951502 |
| UCEC       | 0.273262 | 2.11E-10 | 0.041268 | 0.344275 | 0.36993  | 0        |
| BRCA       | 0.461305 | 0        | 0.062224 | 0.040359 | 0.357279 | 0        |
| HNSC       | 0.090357 | 0.044313 | 0.101004 | 0.024515 | 0.376125 | 0        |
| LUSC       | 0.003724 | 0.934707 | 0.016492 | 0.716766 | 0.445858 | 0        |
| UCS        | -0.01784 | 0.896022 | 0.241012 | 0.073706 | 0.085988 | 0.527581 |
| LUAD       | 0.315692 | 4.05E-13 | 0.009767 | 0.825946 | 0.439484 | 0        |
| COAD       | 0.313762 | 1.92E-11 | 0.144268 | 0.002383 | 0.26202  | 2.55E-08 |
| KIRP       | 0.235281 | 6.53E-05 | 0.336008 | 7.89E-09 | 0.347797 | 2.18E-09 |
| OV         | 0.273163 | 7.27E-06 | 0.211506 | 0.000556 | 0.280531 | 4.02E-06 |
| LIHC       | 0.099751 | 0.055261 | 0.366381 | 4.62E-13 | 0.291637 | 1.28E-08 |
| STAD       | 0.361655 | 1.74E-12 | 0.221967 | 2.13E-05 | 0.318356 | 7.13E-10 |
| SARC       | 0.161406 | 0.009467 | 0.134931 | 0.030325 | 0.354139 | 6.22E-09 |
| READ       | 0.175294 | 0.028729 | 0.127477 | 0.112713 | 0.245329 | 0.002077 |
| CESC       | 0.129904 | 0.02379  | -0.01952 | 0.7349   | 0.274216 | 1.38E-06 |
| MESO       | 0.057069 | 0.60108  | 0.276513 | 0.010163 | 0.338271 | 0.001529 |
| BLCA       | 0.094718 | 0.057172 | -0.07398 | 0.13764  | 0.096825 | 0.05184  |
| KIRC       | 0.168548 | 0.000126 | 0.2471   | 1.53E-08 | 0.327502 | 3.48E-14 |
| PAAD       | 0.139856 | 0.081641 | 0.28816  | 0.00028  | 0.436598 | 1.73E-08 |
| ESCA       | 0.293367 | 0.000177 | 0.187774 | 0.017536 | 0.236262 | 0.002693 |
| CHOL       | 0.050193 | 0.770682 | 0.058172 | 0.735368 | 0.380952 | 0.022539 |
| GBM        | -0.02262 | 0.772193 | 0.203355 | 0.008692 | -0.33106 | 1.48E-05 |
| PRAD       | 0.383037 | 0        | -0.01697 | 0.70715  | 0.118887 | 0.008298 |
| THCA       | -0.07716 | 0.083228 | 0.2027   | 4.61E-06 | 0.253386 | 8.71E-09 |
| SKCM       | -0.07963 | 0.084297 | 0.090325 | 0.050128 | -0.02843 | 0.538035 |
| LAML       | 0.369887 | 5.48E-06 | -0.27407 | 0.000886 | 0.334168 | 4.42E-05 |
| DLBC       | -0.014   | 0.924734 | 0.052215 | 0.72377  | 0.348676 | 0.015583 |
| ACC        | 0.099736 | 0.384186 | 0.25085  | 0.026996 | 0.204315 | 0.072854 |
| KICH       | -0.01914 | 0.880476 | 0.071291 | 0.574741 | 0.262134 | 0.036689 |
| UVM        | 0.227496 | 0.042618 | 0.023019 | 0.839105 | 0.105767 | 0.349711 |
| LGG        | 0.039735 | 0.364468 | 0.275996 | 1.61E-10 | -0.55083 | 0        |
| PCPG       | -0.2549  | 0.000536 | 0.237951 | 0.001253 | -0.07755 | 0.297788 |
| THYM       | -0.38582 | 1.71E-05 | 0.043249 | 0.64003  | 0.296589 | 0.001105 |

Table S2 The univariate cox and multivariate cox of PRDXs and clinical characteristics.

| Characterics | Unicox |             |                  | Multicox |             |                  |
|--------------|--------|-------------|------------------|----------|-------------|------------------|
|              | HR     | 95%CI       | <i>P</i>         | HR       | 95%CI       | <i>P</i>         |
| age          | 1.033  | 1.017-1.049 | <b>&lt;0.001</b> | 1.031    | 1.014-1.048 | <b>0.00031</b>   |
| gender       | 0.897  | 0.648-1.241 | 0.512            | 0.897    | 0.644-1.251 | 0.522            |
| stage        | 2.228  | 1.539-3.227 | <b>&lt;0.001</b> | 2.066    | 1.408-3.032 | <b>&lt;0.001</b> |
| grade        | 0.344  | 0.085-1.388 | 0.133            | 0.749    | 0.178-3.16  | 0.695            |
| PRDX1        | 1.445  | 1.147-1.82  | <b>0.001</b>     | 1.158    | 0.896-1.499 | 0.262            |
| PRDX2        | 0.984  | 0.791-1.224 | 0.884            | 1.046    | 0.835-1.309 | 0.697            |
| PRDX3        | 0.969  | 0.736-1.276 | 0.821            | 0.998    | 0.736-1.355 | 0.991            |
| PRDX4        | 1.184  | 0.953-1.469 | 0.126            | 0.939    | 0.734-1.201 | 0.615            |
| PRDX5        | 1.024  | 0.805-1.304 | 0.845            | 1.143    | 0.887-1.473 | 0.301            |
| PRDX6        | 1.394  | 1.11-1.75   | <b>0.004</b>     | 1.275    | 0.979-1.659 | <b>0.071</b>     |

Table S3 The associations between target drugs and PRDXs expression levels.

| <b>Drug</b>   | <b>PRDX1</b> | <b>PRDX2</b> | <b>PRDX3</b> | <b>PRDX4</b> | <b>PRDX5</b> | <b>PRDX6</b> |
|---------------|--------------|--------------|--------------|--------------|--------------|--------------|
| Vandetanib    | 0.194647     | -0.0182      | 0.563382     | 0.339325     | 0.114883     | 0.438373     |
| Gemcitabine   | 0.149144     | 0.070469     | 0.213025     | -0.05886     | -0.19928     | 0.051208     |
| AZD8055       | 0.147519     | 0.150818     | 0.084566     | 0.031925     | -0.04212     | 0            |
| Z-LLNle-CHO   | 0.131679     | 0            | -0.06794     | 0.019206     | -0.03942     | 0.090389     |
| GDC-0941      | 0.131137     | 0.065384     | 0.317817     | 0.104295     | -0.04263     | 0.010344     |
| Doxorubicin   | 0.128033     | 0.110062     | 0.179063     | -0.10524     | -0.17022     | 0.478478     |
| Irinotecan    | 0.11119      | 0.094764     | 0.184622     | -0.12484     | -0.18223     | 0.041502     |
| 17-AAG        | 0.107565     | 0            | 0.180897     | -0.04648     | 0.054854     | 0.091082     |
| lapatinib     | 0.087885     | 0.036537     | 0.102143     | -0.14497     | 0.120357     | 0.086827     |
| Mitomycin-C   | 0.08725      | 0.184876     | 0.104634     | -0.07691     | -0.12918     | 0.025398     |
| temsirolimus  | 0.082543     | 0.145909     | 0.107624     | 0.264633     | -0.05428     | 0.363514     |
| Crizotinib    | 0.081912     | 0.095706     | 0.319006     | 0.263822     | -0.07995     | 0.527947     |
| Pazopanib     | 0.053164     | 0            | 0.200807     | 0.20384      | -0.0525      | 0.478478     |
| BIBR-1532     | 0.050339     | 0.182783     | 0.051799     | 0.012032     | -0.02248     | 0            |
| GNF-2         | 0.021132     | 0            | -0.04187     | -0.05813     | -0.09106     | 0.200791     |
| FTI-277       | 0.018747     | 0            | -0.0439      | -0.00509     | 0.082744     | 0.033056     |
| bortezomib    | 0            | 0.167132     | 0            | 0            | 0            | 0            |
| TAE684        | -0.01805     | 0.089642     | -0.12224     | 0.154983     | 0.094301     | 0.077648     |
| OSI-906       | -0.03159     | 0.074328     | -0.06358     | 0.089355     | 0.076518     | -0.05009     |
| salermide     | -0.04906     | 0.168997     | -0.03464     | 0.032716     | 0            | 0            |
| cediranib     | -0.10654     | 0.04304      | 0.051591     | 0.118544     | -0.02912     | -0.08283     |
| BIX-01294     | -0.11153     | 0.18406      | -0.10008     | -0.09922     | -0.09112     | -0.17917     |
| staurosporine | -0.12849     | 0.005329     | 0.019075     | 0.174245     | -0.01122     | -0.06783     |
| Topotecan     | -0.16783     | 0.160954     | 0.182319     | -0.08754     | -0.11819     | -0.05245     |
| ML312         | -0.18256     | 0.105382     | -0.07989     | 0.178524     | 0.01736      | -0.02497     |

# Freescience Editorial Team

## Certificate of English Editing

### Paper Title

Integrative analysis the characterization of peroxiredoxins in pan-cancer

### Authors

Lei Gao<sup>1†</sup>, Jialin Meng<sup>2†</sup>, Chuang Yue<sup>3†</sup>, Xingyu Wu<sup>3</sup>, Quanxin Su<sup>3</sup>, Hao Wu<sup>3</sup>, Ze Zhang<sup>3</sup>, Qinzhou Yu<sup>2</sup>, Shenglin Gao<sup>3\*</sup>, Song Fan<sup>2\*</sup>, Li Zu<sup>3\*</sup>

This certificate is issued as a confirmation that the paper mentioned above has been proofread and edited for language clarity and grammar by professional editors of our company.

We guarantee that the original message was not distorted, and that the paper is understandable and free of errors assuming that the changes and suggestions given are accepted, and text is not altered without our knowledge

Date of Editing: 06-11-2021

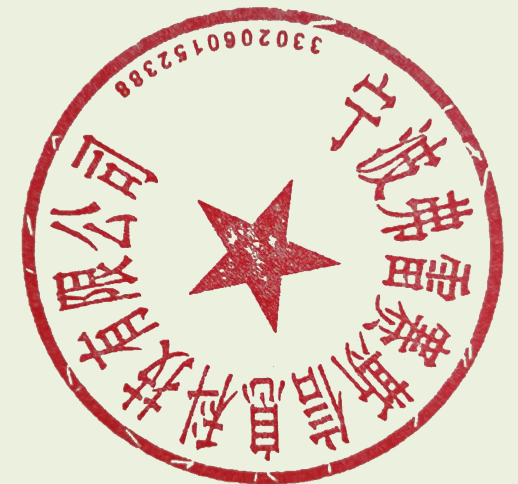

Supplement: MOESM1 [file 12935_2021_2064_MOESM1_ESM-1.pdf]
